# Supplementary material
Source: ML conference proceedings conference paper supplement (https://openaccess.thecvf.com/content/CVPR_2020/html/Li_Learning_to_Optimize_CVPR_2020_paper.html)
Supplement: Supplementary file 1 [file Li_Learning_to_Optimize_CVPR_2020_supplemental.pdf]

# Learning to Optimize Non-Rigid Tracking

## Supplementary Material

**Nonrigid Dataset** Fig. 1 shows the examples in the collected non-rigid dataset. Similar to the ScanNet, the RGB-D videos are captured via iPad mounted Structure Sensor. The depth frames are recorded at a resolution of  $640 \times 480$ . A variety of dynamic objects are included: animals, adults, children, cloth, furniture, *etc.* The backgrounds vary from static scenes to dynamic ones with multiple moving objects. Refer to [1] for more details.

**Tracking Results** Fig. 2 and Fig. 3 show the frame-frame non-rigid tracking results on different ranges of motion, from small to large. We compare our method with two baselines, N-ICP-1 [3] and N-ICP-2 [4]. Though all three methods show artifacts when the motion is large, the results of our method are geometrically closer to the target frames.

**Network Config** Table. 1 shows the network structure of the non-rigid feature extractor. It is based on the fully convolutional networks [2]. The RGB-D images are resized to  $128 \times 96$  before feeding to the feature extractor. All convolutions are followed by a batch normalization layer and a ReLU layer. We use spatial average pooling of size 2 to down-sample features between two feature pyramids. The input volume is  $[128, 96, 4]$ , where 4 represents the 4 channels of the RGB-D frame. Down-sampling is applied three times in total. The output volume of the network is  $[16, 12, 5]$ . Table 2 shows the network structure of the ConditionNet. The number of input and output channels for ConditionNet-Dense and ConditionNet-Sparse is 1. ConditionNet-Diagonal has 36 channels for input and 21 channels for output.

## References

- [1] Aljaž Božič, Michael Zollhöfer, Christian Theobalt, and Matthias Nießner. Deepdeform: Learning non-rigid rgb-d reconstruction with semi-supervised data. In *CVPR*, 2020. 1
- [2] Jonathan Long, Evan Shelhamer, and Trevor Darrell. Fully convolutional networks for semantic segmentation. In *Proceedings of the IEEE conference on computer vision and pattern recognition*, pages 3431–3440, 2015. 1
- [3] Richard A Newcombe, Dieter Fox, and Steven M Seitz. Dynamicfusion: Reconstruction and tracking of non-rigid scenes in real-time. In *CVPR*, pages 343–352, 2015. 1, 3, 4
- [4] Michael Zollhöfer, Matthias Nießner, Shahram Izadi, Christoph Rehmann, Christopher Zach, Matthew Fisher, Chenglei Wu, Andrew Fitzgibbon, Charles Loop, Christian Theobalt, et al. Real-time non-rigid reconstruction using an rgb-d camera. *ACM Transactions on Graphics (ToG)*, 33(4):156, 2014. 1, 3, 4

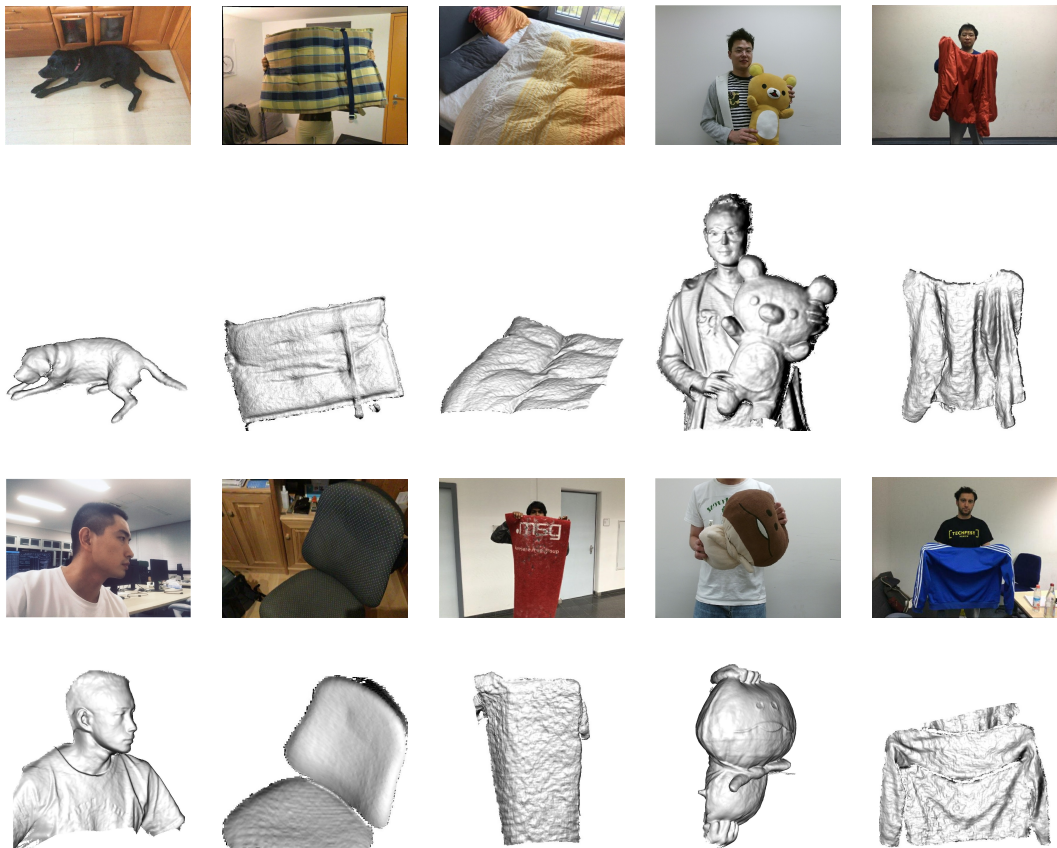

Figure 1. Examples of sequence in the non-rigid dataset. **Top row:** Color frame in the sequence. **Bottom row:** The reconstructed foreground object models using our non-rigid tracking and reconstruction method.

Figure 2. Non-Rigid tracking results on the *kitty* scene.

| Motion Size (Source $\rightarrow$ target) | Small (0 $\rightarrow$ 3)                                                           | Medium (0 $\rightarrow$ 10)                                                          | Large (0 $\rightarrow$ 19)                                                            |
|-------------------------------------------|-------------------------------------------------------------------------------------|--------------------------------------------------------------------------------------|---------------------------------------------------------------------------------------|
| Target color image                        | 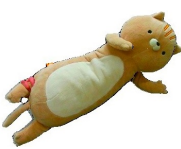   | 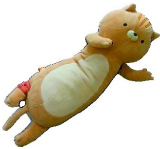   | 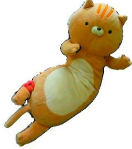   |
| Target Mesh                               | 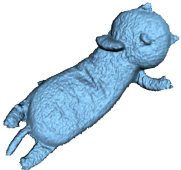   | 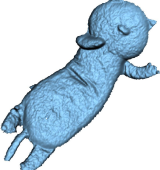   | 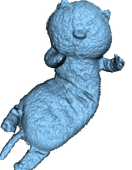   |
| Initial Alignment                         | 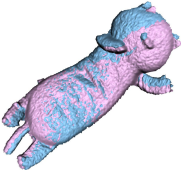  | 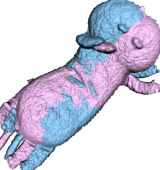  | 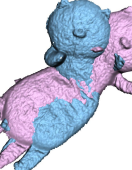  |
| N-ICP-1[3]                                | 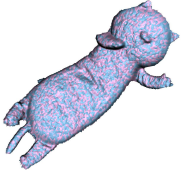 | 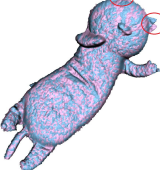 | 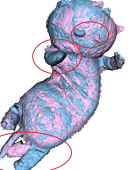 |
| N-ICP-2 [4]                               | 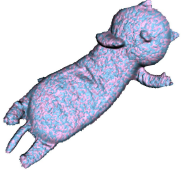 | 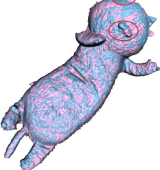 | 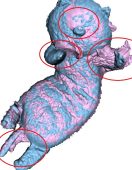 |
| Ours                                      | 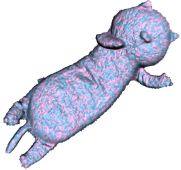 | 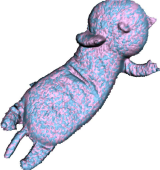 | 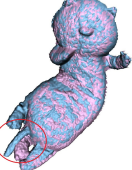 |

Figure 3. Non-Rigid tracking results on the *hoody* scene.

| Motion Size (Source $\rightarrow$ Target) | Small (0 $\rightarrow$ 2)                                                           | Medium (0 $\rightarrow$ 5)                                                           | Large (0 $\rightarrow$ 12)                                                            |
|-------------------------------------------|-------------------------------------------------------------------------------------|--------------------------------------------------------------------------------------|---------------------------------------------------------------------------------------|
| Target color image                        | 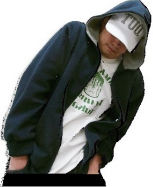   | 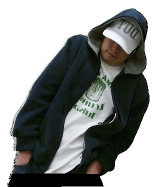   | 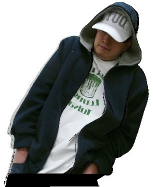   |
| Initial Alignment                         | 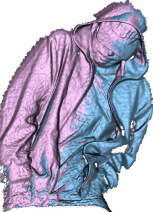   | 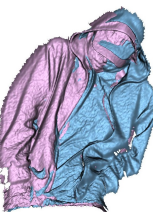   | 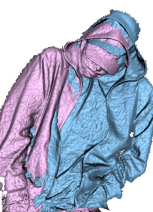   |
| N-ICP-1[3]                                | 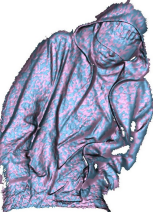  | 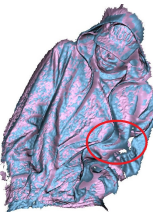  | 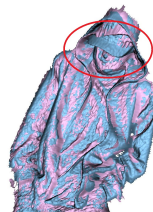  |
| N-ICP-2 [4]                               | 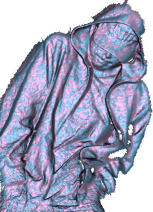 | 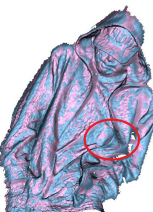 | 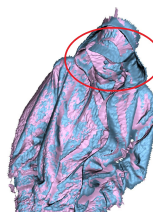 |
| Ours                                      | 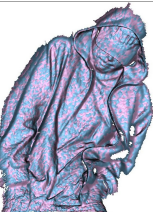 | 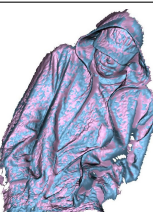 | 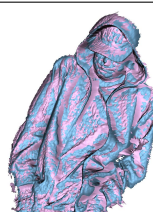 |

| Module Name     | Channels | Stride | Batch Norm. | Activation | Dilation |
|-----------------|----------|--------|-------------|------------|----------|
| Conv2d          | 16       | 1      | True        | ReLU       | 1        |
| Conv2d          | 32       | 1      | True        | ReLU       | 2        |
| Conv2d          | 32       | 1      | True        | ReLU       | 2        |
| Average Polling |          |        |             |            |          |
| Conv2d          | 32       | 1      | True        | ReLU       | 1        |
| Conv2d          | 64       | 1      | True        | ReLU       | 2        |
| Conv2d          | 64       | 1      | True        | ReLU       | 2        |
| Average Polling |          |        |             |            |          |
| Conv2d          | 64       | 1      | True        | ReLU       | 1        |
| Conv2d          | 96       | 1      | True        | ReLU       | 2        |
| Conv2d          | 96       | 1      | True        | ReLU       | 2        |
| Average Polling |          |        |             |            |          |
| Conv2d          | 96       | 1      | True        | ReLU       | 1        |
| Conv2d          | 128      | 1      | True        | ReLU       | 2        |
| Conv2d          | 128      | 1      | True        | ReLU       | 2        |
| Conv2d          | 5        | 1      | True        | ReLU       | 1        |

Table 1. The network configuration of the non-rigid extractor.

| Module Name            | Channels  | Stride | Batch Norm. | Activation | padding |
|------------------------|-----------|--------|-------------|------------|---------|
| Input                  | $n_{in}$  |        |             |            |         |
| Conv2D-1.1             | 32        | 1      | true        | PReLU      | 1       |
| Conv2D-1.2             | 32        | 1      | true        | PReLU      | 1       |
| Max pooling            |           |        |             |            |         |
| Conv2D-2.1             | 64        | 1      | true        | PReLU      | 1       |
| Conv2D-2.2             | 64        | 1      | true        | PReLU      | 1       |
| Max pooling            |           |        |             |            |         |
| Conv2D-3.1             | 128       | 1      | true        | PReLU      | 1       |
| Conv2D-3.2             | 128       | 1      | true        | PReLU      | 1       |
| Max pooling            |           |        |             |            |         |
| Conv2D-4.1             | 128       | 1      | true        | PReLU      | 1       |
| Conv2D-4.2             | 128       | 1      | true        | PReLU      | 1       |
| NearestUpSample1       |           |        |             |            |         |
| Concat (w/ Conv2d-3.2) | 128+128   | 1      | true        | PReLU      | 1       |
| Conv2D                 | 128       | 1      | true        | PReLU      | 1       |
| Conv2D                 | 128       | 1      | true        | PReLU      | 1       |
| NearestUpSample2       |           |        |             |            |         |
| Concat (w/ Conv2d-2.2) | 128+64    | 1      | true        | PReLU      | 1       |
| Conv2D                 | 64        | 1      | true        | PReLU      | 1       |
| Conv2D                 | 64        | 1      | true        | PReLU      | 1       |
| NearestUpSample3       |           |        |             |            |         |
| Concat (w/ Conv2d-1.2) | 64+32     | 1      |             | PReLU      | 1       |
| Conv2D                 | 32        | 1      | true        | PReLU      | 1       |
| Conv2D                 | $n_{out}$ | 1      | true        | PReLU      | 1       |

Table 2. The network configuration of ConditionNet.  $n_{in} = 1, n_{out} = 1$  for ConditionNet-Dense and ConditionNet-Sparse.  $n_{in} = 36, n_{out} = 21$  for ConditionNet-Diagonal. The kernel size is 2x2 for ConditionNet-Diagonal and alternate between 1x1 and 2x2 for ConditionNet-Dense and ConditionNet-Sparse.
